# Supplementary material for: Fatigue Life Prediction Model of FRP–Concrete Interface Based on Gene Expression Programming
Source: MDPI journal article supplement (doi:10.3390/ma17030690), 2024-01-31
Supplement: s1 [file s1]

Supplementary materials

Table S1

| Reinforcement method | Author      | Specimen number    | $f_t$ (MPa) | $L$ (mm) | $E_f$ (GPa) | w/W | $S$      | $\log(N)$ |
|----------------------|-------------|--------------------|-------------|----------|-------------|-----|----------|-----------|
| NSM                  | Jia-xuan, C | B2F32              | 3.040978    | 28       | 140.2       | 2   | 0.049152 | 6.30103   |
|                      |             | B2F34              | 3.040978    | 28       | 140.2       | 2   | 0.055488 | 6.30103   |
|                      |             | B2F36              | 3.040978    | 28       | 140.2       | 2   | 0.062208 | 6.30103   |
|                      |             | B2F38              | 3.040978    | 28       | 140.2       | 2   | 0.069312 | 6.30103   |
|                      |             | B2F40              | 3.040978    | 28       | 140.2       | 2   | 0.0768   | 6.30103   |
|                      |             | B2F42.5_1          | 3.040978    | 28       | 140.2       | 2   | 0.0867   | 6.018435  |
|                      |             | B2F42.5_2          | 3.040978    | 28       | 140.2       | 2   | 0.0867   | 6.30103   |
|                      |             | B2F45_1            | 3.040978    | 28       | 140.2       | 2   | 0.0972   | 5.377239  |
|                      |             | B2F45_2            | 3.040978    | 28       | 140.2       | 2   | 0.0972   | 5.322095  |
|                      |             | B2F48_1            | 3.040978    | 28       | 140.2       | 2   | 0.110592 | 5.779539  |
|                      |             | B2F48_2            | 3.040978    | 28       | 140.2       | 2   | 0.110592 | 5.779539  |
|                      |             | B2F50_1            | 3.040978    | 28       | 140.2       | 2   | 0.12     | 5.662145  |
|                      |             | B2F50_2            | 3.040978    | 28       | 140.2       | 2   | 0.12     | 5.662145  |
|                      |             | B3L20              | 3.040978    | 20       | 140.2       | 2   | 0.0768   | 6.30103   |
|                      |             | B3L24              | 3.040978    | 24       | 140.2       | 2   | 0.0768   | 6.30103   |
|                      |             | B3L28              | 3.040978    | 28       | 140.2       | 2   | 0.0768   | 6.30103   |
|                      | Fernandes   | DPT1_F50           | 3.289387    | 60       | 169.5       | 3   | 0.10875  | 6.477121  |
|                      |             | DPT2_F50           | 3.289387    | 60       | 169.5       | 3   | 0.10875  | 6.477121  |
|                      |             | DPT3_F50           | 3.289387    | 60       | 169.5       | 3   | 0.10875  | 6.477121  |
|                      |             | DPT1_F60           | 3.289387    | 60       | 169.5       | 3   | 0.13695  | 5.715874  |
|                      |             | DPT2_F60           | 3.289387    | 60       | 169.5       | 3   | 0.14025  | 5.748963  |
|                      |             | DPT3_F60           | 3.289387    | 60       | 169.5       | 3   | 0.1344   | 5.575188  |
|                      |             | FS10E-60-1         | 3.594775    | 180      | 212         | 3   | 0.175    | 6.185502  |
|                      |             | FS10E-60-2         | 3.594775    | 180      | 212         | 3   | 0.175    | 6.185388  |
|                      |             | FS20E-60-1         | 3.594775    | 180      | 212         | 6   | 0.175    | 6.30103   |
|                      |             | FS20E-60-2         | 3.594775    | 180      | 212         | 6   | 0.175    | 6.30103   |
|                      |             | FR10E-60-1         | 3.594775    | 180      | 212         | 3   | 0.175    | 6.30103   |
|                      |             | FR10E-60-2         | 3.594775    | 180      | 212         | 3   | 0.175    | 6.30103   |
|                      |             | FR20E-60-1         | 3.594775    | 180      | 212         | 6   | 0.175    | 6.30103   |
|                      |             | FR20E-60-2         | 3.594775    | 180      | 212         | 6   | 0.175    | 6.30103   |
|                      |             | FS10E-67.5-1       | 3.594775    | 180      | 212         | 3   | 0.222813 | 4.144387  |
|                      |             | FS10E-67.5-2       | 3.594775    | 180      | 212         | 3   | 0.222813 | 4.130784  |
|                      |             | FS20E-67.5-1       | 3.594775    | 180      | 212         | 6   | 0.222813 | 6.30103   |
|                      |             | FS20E-67.5-2       | 3.594775    | 180      | 212         | 6   | 0.222813 | 6.30103   |
|                      |             | FR10E-67.5-1       | 3.594775    | 180      | 212         | 3   | 0.222813 | 5.090089  |
|                      |             | FR10E-67.5-2       | 3.594775    | 180      | 212         | 3   | 0.222813 | 5.075799  |
|                      |             | FR20E-67.5-1       | 3.594775    | 180      | 212         | 6   | 0.222813 | 6.30103   |
|                      |             | FR20E-67.5-2       | 3.594775    | 180      | 212         | 6   | 0.222813 | 6.30103   |
|                      |             | FS10E-75-1         | 3.594775    | 180      | 212         | 3   | 0.27625  | 3.98064   |
|                      |             | FS10E-75-2         | 3.594775    | 180      | 212         | 3   | 0.27625  | 3.954677  |
|                      |             | FS20E-75-1         | 3.594775    | 180      | 212         | 6   | 0.27625  | 6.30103   |
|                      |             | FS20E-75-2         | 3.594775    | 180      | 212         | 6   | 0.27625  | 6.30103   |
|                      | Al-Saadia   | FR10E-75-1         | 3.594775    | 180      | 212         | 3   | 0.27625  | 4.132067  |
|                      |             | FR10E-75-2         | 3.594775    | 180      | 212         | 3   | 0.27625  | 4.099819  |
|                      |             | FR20E-75-1         | 3.594775    | 180      | 212         | 6   | 0.27625  | 6.30103   |
|                      |             | FR20E-75-2         | 3.594775    | 180      | 212         | 6   | 0.27625  | 6.30103   |
|                      |             | FS10E-82.5-1       | 3.594775    | 180      | 212         | 3   | 0.335313 | 3.324077  |
|                      |             | FS10E-82.5-2       | 3.594775    | 180      | 212         | 3   | 0.335313 | 3.304059  |
|                      |             | FS20E-82.5-1       | 3.594775    | 180      | 212         | 6   | 0.335313 | 5.417119  |
|                      |             | FS20E-82.5-2       | 3.594775    | 180      | 212         | 6   | 0.335313 | 5.414094  |
|                      |             | FR10E-82.5-1       | 3.594775    | 180      | 212         | 3   | 0.335313 | 3.907358  |
|                      |             | FR10E-82.5-2       | 3.594775    | 180      | 212         | 3   | 0.335313 | 3.898944  |
|                      | Cheng       | FR20E-82.5-1       | 3.594775    | 180      | 212         | 6   | 0.335313 | 5.953921  |
|                      |             | FR20E-82.5-2       | 3.594775    | 180      | 212         | 6   | 0.335313 | 5.95271   |
|                      |             | FR20E-90-1         | 3.594775    | 180      | 212         | 6   | 0.4      | 4.657629  |
|                      |             | FR20E-90-2         | 3.594775    | 180      | 212         | 6   | 0.4      | 4.657027  |
|                      |             | R-RO-A1-1060-F-N-1 | 3.818353    | 250      | 117         | 1   | 0.172394 | 4.978655  |
|                      |             | R-RO-A1-1060-F-N-2 | 3.818353    | 250      | 117         | 1   | 0.172212 | 4.898456  |
|                      |             | R-RO-A1-1060-F-N-3 | 3.818353    | 250      | 117         | 1   | 0.172415 | 4.855967  |

|    |            |                       |          |     |     |          |          |          |
|----|------------|-----------------------|----------|-----|-----|----------|----------|----------|
| EB |            | R-SC-A1-1060-F-N-1    | 3.818353 | 250 | 113 | 1        | 0.170098 | 5.166149 |
|    |            | R-SC-A1-1060-F-N-2    | 3.818353 | 250 | 113 | 1        | 0.172818 | 4.975818 |
|    |            | R-SC-A1-1060-F-N-3    | 3.818353 | 250 | 113 | 1        | 0.169786 | 4.880739 |
|    |            | R-SCSW-A1-1060-F-N-1b | 3.818353 | 250 | 129 | 1        | 0.173339 | 6.30103  |
|    |            | R-SCSW-A1-1060-F-N-2  | 3.818353 | 250 | 129 | 1        | 0.172831 | 6        |
|    |            | R-SCSW-A1-1060-F-N-3  | 3.818353 | 250 | 129 | 1        | 0.173315 | 6        |
|    |            | S-RO-A1-1060-F-N-1    | 3.818353 | 250 | 168 | 1.666667 | 0.174438 | 4.963396 |
|    |            | S-RO-A1-1060-F-N-2    | 3.818353 | 250 | 168 | 1.666667 | 0.174167 | 5.929593 |
|    |            | S-RO-A1-1060-F-N-3    | 3.818353 | 250 | 168 | 1.666667 | 0.174715 | 6.036561 |
|    |            | S-RO-A2-1060-F-N-2    | 3.818353 | 250 | 168 | 1.666667 | 0.171776 | 5.806441 |
|    |            | S-RO-A2-1060-F-N-3    | 3.818353 | 250 | 168 | 1.666667 | 0.172143 | 6        |
|    |            | S-RO-A3-1060-F-N-1    | 3.818353 | 250 | 168 | 1.666667 | 0.174325 | 6        |
|    |            | S-RO-A3-1060-F-N-2    | 3.818353 | 250 | 168 | 1.666667 | 0.167361 | 6        |
|    |            | S-RO-A3-1060-F-N-3    | 3.818353 | 250 | 168 | 1.666667 | 0.212061 | 6        |
|    |            | S-RO-A4-1060-F-N-1    | 3.818353 | 250 | 168 | 1.666667 | 0.175428 | 6        |
|    |            | S-RO-A4-1060-F-N-2    | 3.818353 | 250 | 168 | 1.666667 | 0.176017 | 6        |
|    |            | S-RO-A4-1060-F-N-3    | 3.818353 | 250 | 168 | 1.666667 | 0.176309 | 6        |
|    | Yun        | F-NSM-A               | 3.714518 | 100 | 257 | 1        | 0.09855  | 6.30103  |
|    |            | F-NSM-B               | 3.714518 | 100 | 257 | 1        | 0.19575  | 6.30103  |
|    | Ding       | FC30-BL100            | 2.718011 | 100 | 165 | 2        | 0.262762 | 4.229707 |
|    |            | FC30-BL150            | 2.718011 | 150 | 165 | 2        | 0.270289 | 4.337898 |
|    |            | FC30-BL200            | 2.718011 | 200 | 165 | 2        | 0.271969 | 4.631941 |
|    | Al-Mahaidi | FS10C-60-1            | 3.040978 | 180 | 212 | 3        | 0.175    | 6.30103  |
|    |            | FS10C-60-2            | 3.040978 | 180 | 212 | 3        | 0.175    | 6.30103  |
|    |            | FS20C-60-1            | 3.040978 | 180 | 212 | 6        | 0.175    | 6.30103  |
|    |            | FS20C-60-2            | 3.040978 | 180 | 212 | 6        | 0.175    | 6.30103  |
|    |            | FR10C-60-1            | 3.040978 | 180 | 212 | 3        | 0.175    | 5.819661 |
|    |            | FR10C-60-2            | 3.040978 | 180 | 212 | 3        | 0.175    | 5.818086 |
|    |            | FR20C-60-1            | 3.040978 | 180 | 212 | 6        | 0.175    | 6.30103  |
|    |            | FR20C-60-2            | 3.040978 | 180 | 212 | 6        | 0.175    | 6.30103  |
|    |            | FS10C-67.5-1          | 3.040978 | 180 | 212 | 3        | 0.222813 | 5.716799 |
|    |            | FS10C-67.5-2          | 3.040978 | 180 | 212 | 3        | 0.222813 | 5.715443 |
|    |            | FS20C-67.5-1          | 3.040978 | 180 | 212 | 6        | 0.222813 | 5.182349 |
|    |            | FS20C-67.5-2          | 3.040978 | 180 | 212 | 6        | 0.222813 | 5.135129 |
|    |            | FR10C-67.5-1          | 3.040978 | 180 | 212 | 3        | 0.222813 | 5.423621 |
|    |            | FR10C-67.5-2          | 3.040978 | 180 | 212 | 3        | 0.222813 | 5.42281  |
|    |            | FR20C-67.5-1          | 3.040978 | 180 | 212 | 6        | 0.222813 | 5.908961 |
|    |            | FR20C-67.5-2          | 3.040978 | 180 | 212 | 6        | 0.222813 | 4.890443 |
|    |            | FR20IC-67.5-1         | 3.040978 | 180 | 212 | 6        | 0.222813 | 6.30103  |
|    |            | FR20IC-67.5-2         | 3.040978 | 180 | 212 | 6        | 0.222813 | 6.30103  |
|    |            | FS10C-75-1            | 3.040978 | 180 | 212 | 3        | 0.27625  | 4.708752 |
|    |            | FS10C-75-2            | 3.040978 | 180 | 212 | 3        | 0.27625  | 4.677917 |
|    |            | FS20C-75-1            | 3.040978 | 180 | 212 | 6        | 0.27625  | 4.287667 |
|    |            | FS20C-75-2            | 3.040978 | 180 | 212 | 6        | 0.27625  | 4.242144 |
|    |            | FR10C-75-1            | 3.040978 | 180 | 212 | 3        | 0.27625  | 3.913761 |
|    |            | FR10C-75-2            | 3.040978 | 180 | 212 | 3        | 0.27625  | 3.827951 |
|    |            | FR20C-75-1            | 3.040978 | 180 | 212 | 6        | 0.27625  | 4.383079 |
|    |            | FR20C-75-2            | 3.040978 | 180 | 212 | 6        | 0.27625  | 4.343783 |
|    |            | FS10C-82.5-1          | 3.040978 | 180 | 212 | 3        | 0.335313 | 4.253919 |
|    |            | FS10C-82.5-2          | 3.040978 | 180 | 212 | 3        | 0.335313 | 4.215611 |
|    |            | FR20C-82.5-1          | 3.040978 | 180 | 212 | 6        | 0.335313 | 4.102399 |
|    |            | FR20C-82.5-2          | 3.040978 | 180 | 212 | 6        | 0.335313 | 4.080049 |
|    | Fuling, W  | F-0.45-1              | 3.764337 | 150 | 210 | 0.5      | 0.100238 | 6.30103  |
|    |            | F-0.45-2              | 3.764337 | 150 | 210 | 0.5      | 0.100238 | 6.30103  |
|    |            | F-0.45-3              | 3.764337 | 150 | 210 | 0.5      | 0.100238 | 6.30103  |
|    |            | F-0.55-1              | 3.764337 | 150 | 210 | 0.5      | 0.149738 | 6.30103  |
|    |            | F-0.55-2              | 3.764337 | 150 | 210 | 0.5      | 0.149738 | 6.30103  |
|    |            | F-0.55-3              | 3.764337 | 150 | 210 | 0.5      | 0.149738 | 6.30103  |
| EB | Carlton    | DS-F1                 | 2.781967 | 152 | 230 | 0.2      | 0.29925  | 3.11059  |
|    |            | DS-F2                 | 2.781967 | 152 | 230 | 0.2      | 0.2132   | 4.120311 |
|    |            | DS-F3                 | 2.781967 | 152 | 230 | 0.2      | 0.16875  | 5.068167 |
|    | Bo, W      | F-100-2               | 2.923261 | 100 | 165 | 0.333333 | 0.091908 | 6.30103  |
|    |            | F-150-2               | 2.923261 | 150 | 165 | 0.333333 | 0.148571 | 6.30103  |
|    |            | F-200-2               | 2.923261 | 200 | 165 | 0.333333 | 0.053181 | 6.30103  |
|    |            | F-150-1               | 2.923261 | 150 | 165 | 0.333333 | 0.11375  | 6.30103  |

|  |             |          |     |        |          |          |          |
|--|-------------|----------|-----|--------|----------|----------|----------|
|  | F-150-3     | 2.923261 | 150 | 165    | 0.333333 | 0.054102 | 6.30103  |
|  | C13HS-F70   | 1.991578 | 400 | 156    | 0.333333 | 0.24     | 5.105323 |
|  | C21HS-F60   | 2.222969 | 400 | 156    | 0.333333 | 0.175    | 6        |
|  | C21HS-F70   | 2.222969 | 400 | 156    | 0.333333 | 0.24     | 4.45011  |
|  | C21HS-F70-T | 2.222969 | 400 | 156    | 0.333333 | 0.24     | 4.787553 |
|  | C21HS-F75-T | 2.222969 | 400 | 156    | 0.333333 | 0.27625  | 3.746089 |
|  | C21HS-F80   | 2.222969 | 400 | 156    | 0.333333 | 0.315    | 3.250176 |
|  | C36HS-F50   | 3.015584 | 400 | 156    | 0.333333 | 0.12     | 6        |
|  | C36HS-F60   | 3.015584 | 400 | 156    | 0.333333 | 0.175    | 5.312124 |
|  | C36HS-F70   | 3.015584 | 400 | 156    | 0.333333 | 0.24     | 3.617525 |
|  | F-EB-A      | 3.215878 | 100 | 257    | 0.25     | 0.09625  | 6.30103  |
|  | F-EB-B      | 3.235562 | 100 | 257    | 0.25     | 0.15355  | 6.30103  |
|  | F2          | 2.781967 | 300 | 114.9  | 0.25     | 0.23375  | 4.037426 |
|  | F3          | 2.781967 | 300 | 264.86 | 0.25     | 0.23375  | 4.177536 |
|  | F4          | 2.781967 | 300 | 128.46 | 0.25     | 0.23375  | 4.318877 |
|  | F5          | 2.781967 | 300 | 138.35 | 0.25     | 0.23375  | 4.491362 |
|  | F6          | 2.781967 | 300 | 220.6  | 0.25     | 0.23375  | 4.291147 |
|  | F7          | 2.781967 | 300 | 128.46 | 0.25     | 0.23375  | 4.187521 |
|  | F9          | 2.781967 | 300 | 114.9  | 0.25     | 0.30875  | 3.462398 |
|  | F10         | 2.781967 | 300 | 264.86 | 0.25     | 0.30875  | 3.70757  |
|  | F11         | 2.781967 | 300 | 128.46 | 0.25     | 0.30875  | 4.100371 |
|  | F12         | 2.781967 | 300 | 138.35 | 0.25     | 0.30875  | 4.183301 |
|  | F13         | 2.781967 | 300 | 220.6  | 0.25     | 0.30875  | 3.956649 |
|  | F14         | 2.163287 | 300 | 128.46 | 0.25     | 0.30875  | 3.982271 |
|  | FA-1        | 3.500456 | 250 | 226    | 0.5      | 0.252551 | 4.395868 |
|  | FA-2        | 3.500456 | 250 | 226    | 0.5      | 0.252551 | 4.395885 |
|  | FA-3        | 3.500456 | 250 | 226    | 0.5      | 0.252551 | 4.395903 |
|  | FB-1        | 3.500456 | 250 | 226    | 0.5      | 0.204566 | 4.825588 |
|  | FB-2        | 3.500456 | 250 | 226    | 0.5      | 0.204566 | 4.825588 |
|  | FC-1        | 3.500456 | 250 | 226    | 0.5      | 0.161633 | 5.015967 |
|  | FC-2        | 3.500456 | 250 | 226    | 0.5      | 0.161633 | 5.095455 |
|  | FD-1        | 3.500456 | 250 | 226    | 0.5      | 0.12375  | 5.926881 |
|  | FD-2        | 3.500456 | 250 | 226    | 0.5      | 0.12375  | 5.959055 |
|  | FE-1        | 3.500456 | 250 | 226    | 0.5      | 0.090918 | 6.362844 |
|  | FE-2        | 3.500456 | 250 | 226    | 0.5      | 0.090918 | 6.362844 |
|  | FF-1        | 3.500456 | 250 | 226    | 0.5      | 0.063138 | 6.477121 |
|  | SC60-1      | 3.984809 | 300 | 175    | 0.25     | 0.16875  | 5.658774 |
|  | SC60-2      | 3.984809 | 300 | 178.5  | 0.25     | 0.23375  | 5.079362 |
|  | MC60-1      | 3.984809 | 300 | 160.2  | 0.25     | 0.2552   | 4.814248 |
|  | MC60-2      | 3.984809 | 300 | 158.6  | 0.25     | 0.2816   | 3.334454 |
|  | MC60-3      | 3.984809 | 300 | 160.5  | 0.25     | 0.226512 | 4.662758 |
|  | SC50-3      | 3.528743 | 300 | 176.5  | 0.25     | 0.285566 | 3.999565 |
|  | MC50-1      | 3.528743 | 300 | 157.7  | 0.25     | 0.258    | 4.073718 |
|  | MC50-2      | 3.528743 | 300 | 157    | 0.25     | 0.2052   | 5.015779 |
|  | MC50-3      | 3.528743 | 300 | 160.5  | 0.25     | 0.231438 | 4.778151 |
|  | MC50-4      | 3.528743 | 300 | 160.5  | 0.25     | 0.28288  | 3.740363 |
|  | F-80-1      | 3.040978 | 200 | 240    | 0.5      | 0.315    | 3.973636 |
|  | F-80-2      | 3.040978 | 200 | 240    | 0.5      | 0.315    | 3.973636 |
|  | F-80-3      | 3.040978 | 200 | 240    | 0.5      | 0.315    | 3.973636 |
|  | F-70-1      | 3.040978 | 200 | 240    | 0.5      | 0.24     | 4.659155 |
|  | F-70-2      | 3.040978 | 200 | 240    | 0.5      | 0.24     | 4.659155 |
|  | F-70-3      | 3.040978 | 200 | 240    | 0.5      | 0.24     | 4.659155 |
|  | F-60-1      | 3.040978 | 200 | 240    | 0.5      | 0.175    | 6.20412  |
|  | F-60-3      | 3.040978 | 200 | 240    | 0.5      | 0.175    | 6.30103  |
|  | F-50-1      | 3.040978 | 200 | 240    | 0.5      | 0.12     | 6.477121 |
|  | F-50-2      | 3.040978 | 200 | 240    | 0.5      | 0.12     | 6.477121 |
|  | F-30-1      | 3.040978 | 200 | 240    | 0.5      | 0.04     | 6.30103  |
|  | F-30-2      | 3.040978 | 200 | 240    | 0.5      | 0.04     | 6.301031 |
|  | FT-0        | 2.565751 | 530 | 175    | 0.666667 | 0.14625  | 6.30103  |
|  | FT-2        | 2.565751 | 530 | 175    | 0.666667 | 0.190313 | 4.815026 |
|  | FT-3        | 2.565751 | 530 | 175    | 0.666667 | 0.20625  | 4.816977 |
|  | FT-4        | 2.565751 | 530 | 175    | 0.666667 | 0.24     | 3.97511  |
|  | FT-6        | 2.565751 | 530 | 175    | 0.666667 | 0.225    | 4.127655 |
|  | A-F2-1      | 3.040978 | 200 | 60     | 0.357143 | 0.25665  | 4.216377 |

|         |           |          |     |     |          |         |          |
|---------|-----------|----------|-----|-----|----------|---------|----------|
|         | A-F3-1    | 3.040978 | 200 | 60  | 0.357143 | 0.18705 | 4.997784 |
|         | A-F3-2    | 3.040978 | 200 | 60  | 0.357143 | 0.24745 | 3.557387 |
|         | A-F3-3    | 3.040978 | 200 | 60  | 0.357143 | 0.24745 | 4.146686 |
|         | A-F3-4    | 3.040978 | 200 | 60  | 0.357143 | 0.24745 | 3.230193 |
|         | A-F3-5    | 3.040978 | 200 | 60  | 0.357143 | 0.24    | 3.705436 |
|         | B-F1-4    | 2.938748 | 200 | 105 | 0.357143 | 0.35155 | 3.197005 |
|         | B-F2-4    | 3.141518 | 200 | 105 | 0.357143 | 0.25935 | 3.848374 |
|         | B-F3-1    | 2.990082 | 200 | 105 | 0.357143 | 0.232   | 3.970951 |
|         | B-F3-2    | 3.141518 | 200 | 105 | 0.357143 | 0.22525 | 3.841422 |
|         | B-F3-3    | 2.990082 | 200 | 105 | 0.357143 | 0.225   | 3.889918 |
|         | B-F3-4    | 3.141518 | 200 | 105 | 0.357143 | 0.1892  | 4.723267 |
| Carloni | DDS-FT-1  | 3.141518 | 152 | 230 | 0.2      | 0.261   | 3.971601 |
|         | DDS-FT-2  | 3.141518 | 152 | 230 | 0.2      | 0.2976  | 3.741388 |
|         | DDS-FT-3  | 3.141518 | 152 | 230 | 0.2      | 0.26845 | 4.02387  |
| Ke, L   | A-1       | 4.08163  | 160 | 225 | 0.25     | 0.30195 | 3.414973 |
|         | A-2       | 4.08163  | 160 | 226 | 0.25     | 0.22295 | 4.50515  |
|         | A-3       | 4.08163  | 160 | 227 | 0.25     | 0.1848  | 5.22763  |
|         | A-4       | 4.08163  | 160 | 228 | 0.25     | 0.1148  | 6.190332 |
|         | A-5       | 4.08163  | 160 | 229 | 0.25     | 0.1066  | 6.376577 |
|         | A-6       | 4.08163  | 160 | 230 | 0.25     | 0.0468  | 6.30103  |
|         | B-1       | 2.797842 | 160 | 231 | 0.25     | 0.1848  | 4.945961 |
|         | B-2       | 2.228893 | 160 | 232 | 0.25     | 0.1848  | 4.826075 |
|         | C-1       | 4.08163  | 160 | 233 | 0.36     | 0.22295 | 4.315551 |
|         | C-2       | 4.08163  | 160 | 234 | 0.5      | 0.22295 | 4.072985 |
|         | D-1       | 4.08163  | 60  | 235 | 0.25     | 0.22295 | 3.863323 |
|         | D-2       | 4.08163  | 240 | 236 | 0.25     | 0.22295 | 5.854243 |
|         | E-1       | 4.08163  | 240 | 236 | 0.25     | 0.1848  | 5.986772 |
| Fathi   | CL-50-25  | 3.760236 | 50  | 165 | 0.17     | 0.15    | 4.724112 |
|         | CL-100-25 | 3.760236 | 100 | 165 | 0.17     | 0.15    | 4.901371 |
|         | CL-150-25 | 3.760236 | 150 | 165 | 0.17     | 0.15    | 5.747777 |
|         | CL-200-25 | 3.760236 | 200 | 165 | 0.17     | 0.15    | 5.722946 |
